# Supplementary material for: TSC1 and DEPDC5 regulate HIV-1 latency through the mTOR signaling pathway
Source: PubMed Central journal article supplement (PMC6081400; doi:10.1038/s41426-018-0139-5), 2018-08-08

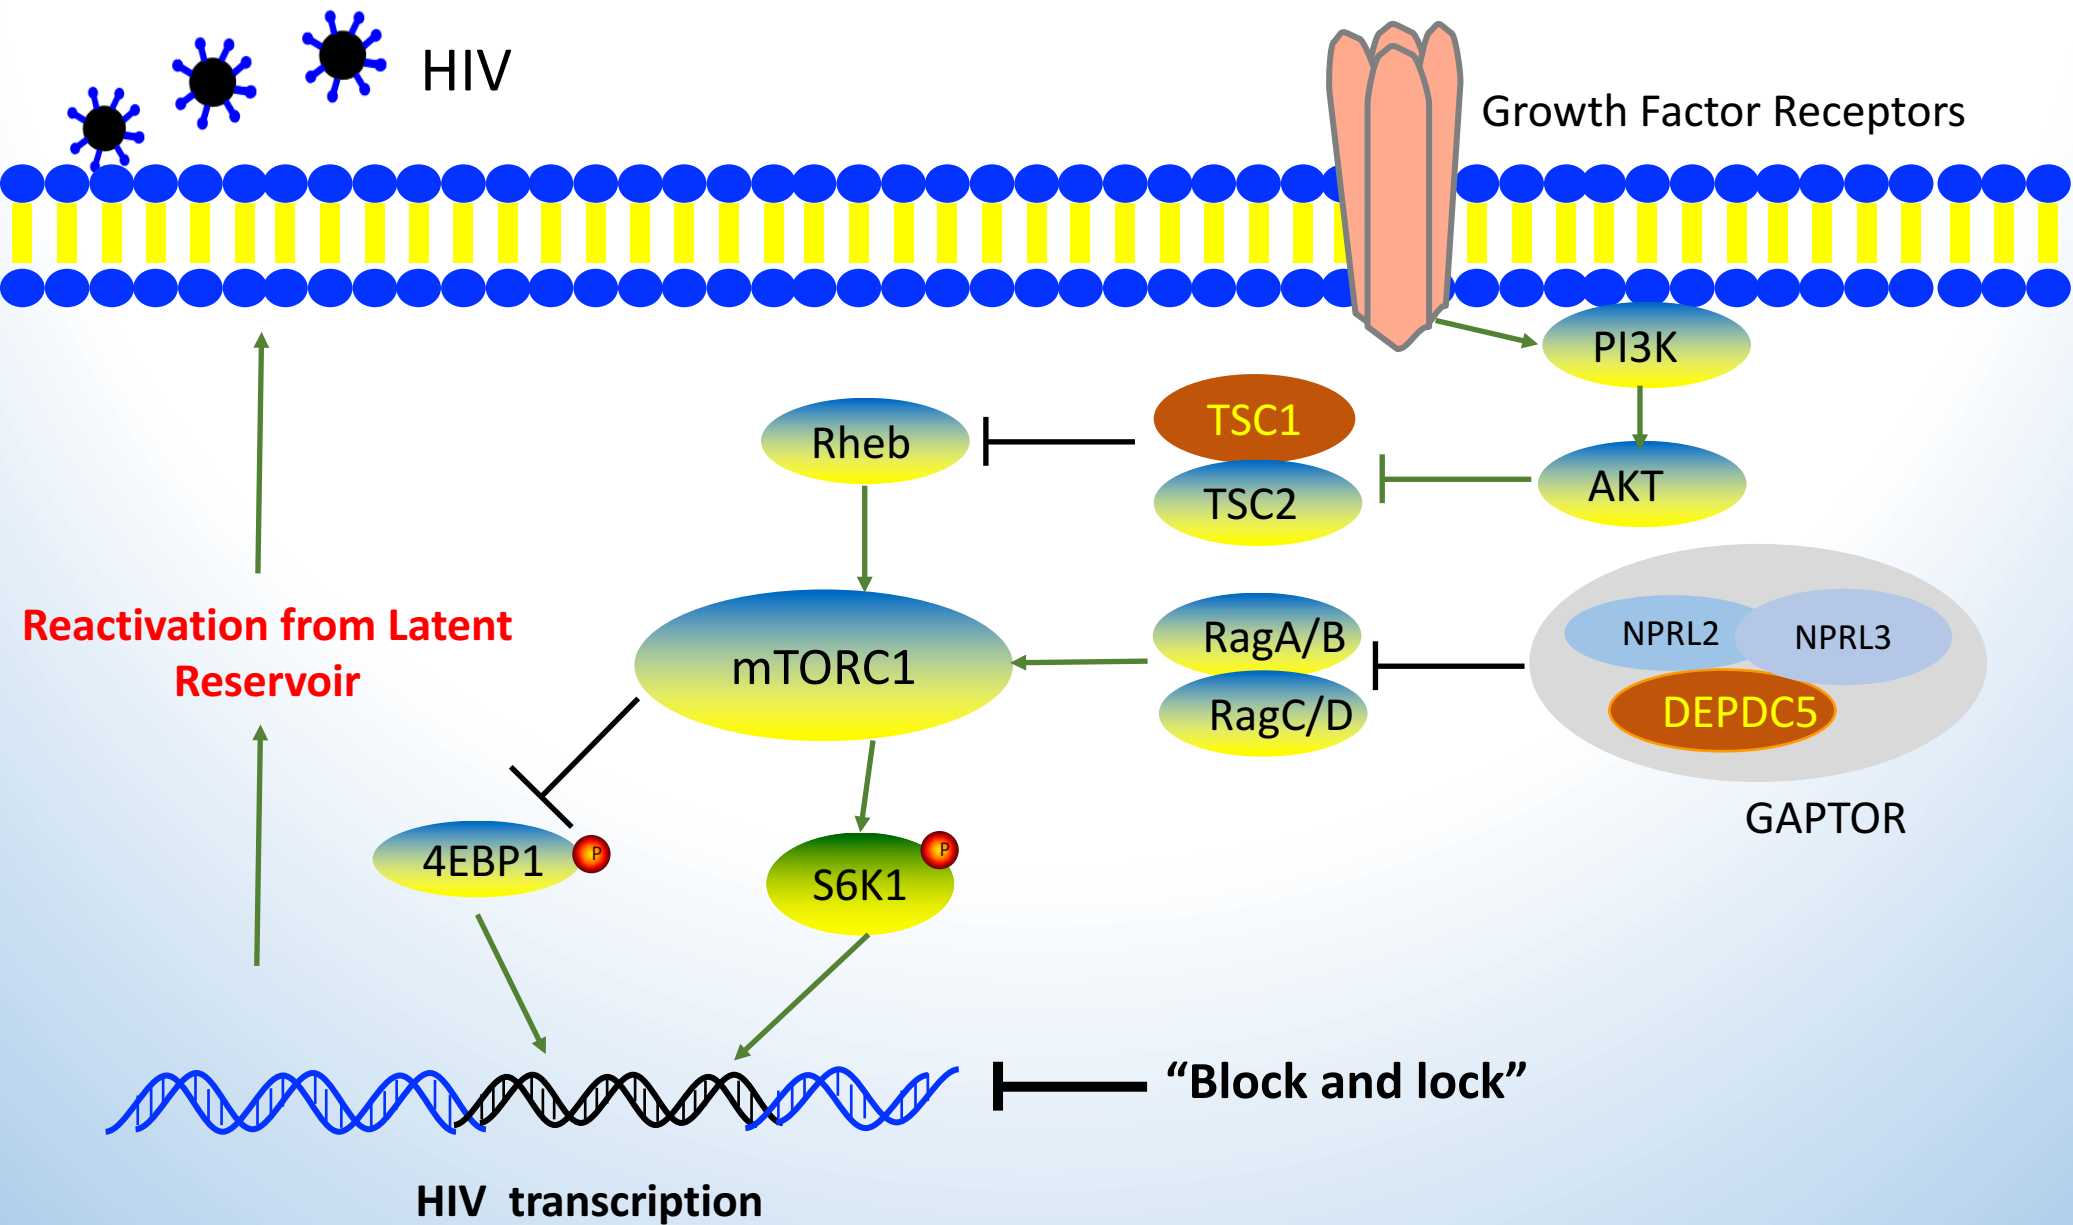

Supplement: 41426_2018_139_MOESM2_ESM.pdf [file 41426_2018_139_MOESM2_ESM.pdf]
